# Supplementary material for: A fixation method to preserve cultured cell cytonemes facilitates mechanistic interrogation of morphogen transport
Source: Oxford University Press journal article supplement (doi:10.1242/dev.152736), 2017-01-01
Supplement: dev152736supp.pdf [file dev152736supp.pdf]

## Supplementary Information

### Supplementary Figures

Supplementary Figure 1

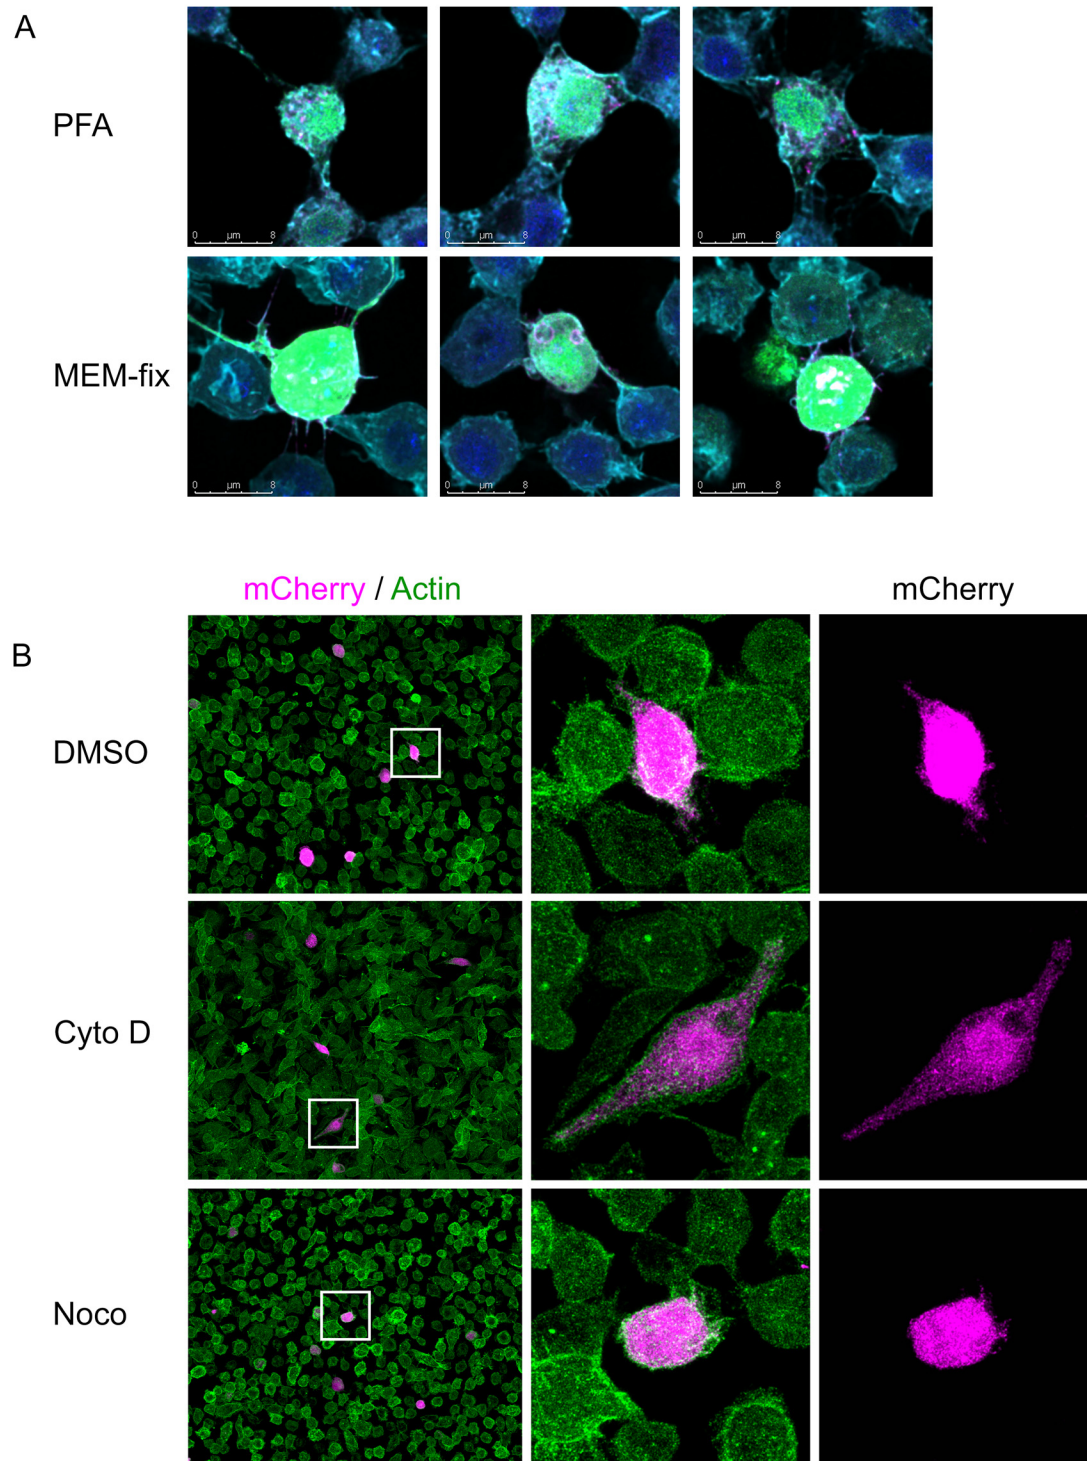

**Supplementary Figure 1. A.** S2 cells expressing GFP (green) and CD8-mCherry (magenta) were fixed with standard 4% PFA (top) or with MEM-fix (bottom). Actin (cyan) is stained with phalloidin. **B.** S2 cells expressing mCherry were treated with 10  $\mu$ M Cytochalasin D, 10  $\mu$ M Nocodazole or DMSO vehicle control as in Fig. 1D-F. Actin (green) was stained with phalloidin. Wide field and zoom images are shown.

Supplementary Figure 2

GFP

Disp-mCherry

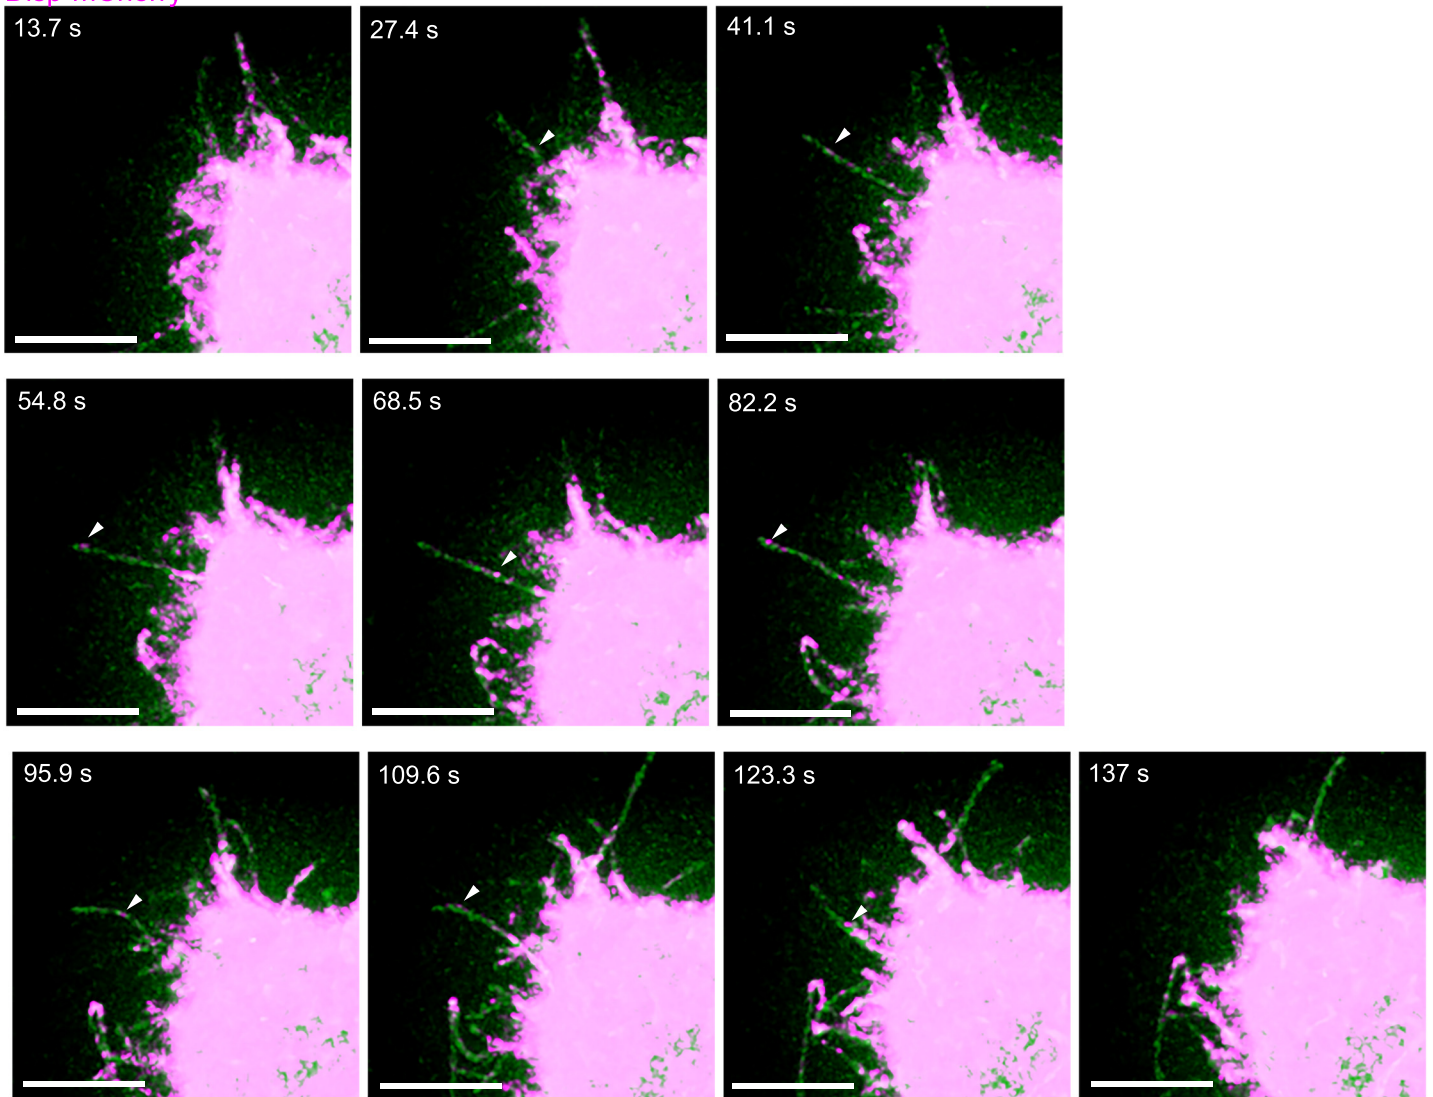

**Supplementary Figure 2.** Still images from Movie 3 show tracking of a Disp-mCherry puncta along a cytoneme (arrowhead). The time stamp for each still is indicated. Disp-mCherry is magenta and GFP is green. Scale bar indicates 5  $\mu\text{m}$ .

Supplementary Figure 3

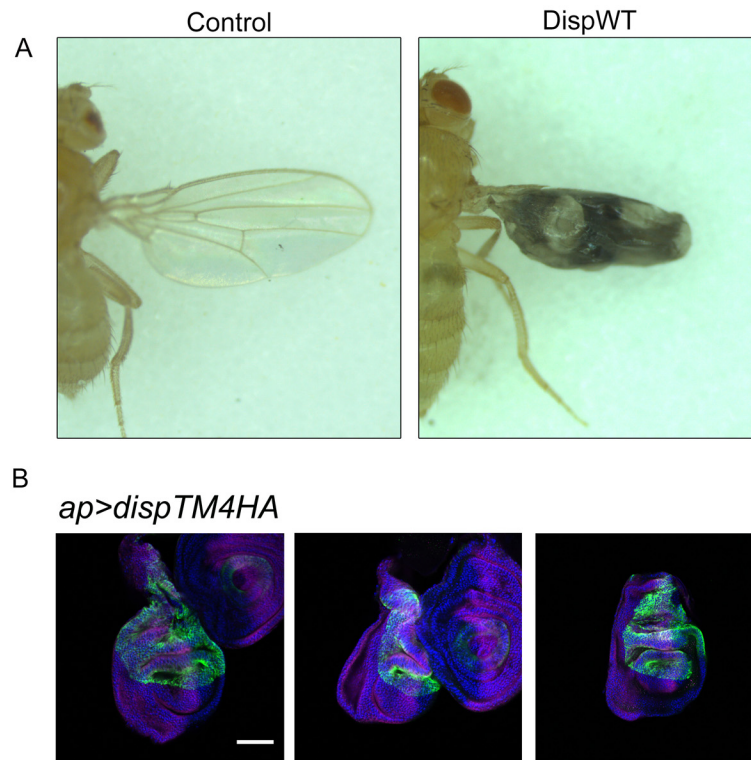

**Supplementary Figure 3.** **A.** Unmounted wings of control and *ap>dispHA* flies are shown to highlight the extent of wing blistering induced by DispHA overexpression. **B.** Wing imaginal discs from surviving *ap>dispTM4HA* 3<sup>rd</sup> instar larva are shown to highlight the severity of disc malformation resulting from DispTM4HA over-expression (green). Ci is shown in magenta and DAPI is blue. Scale bar indicates 50  $\mu$ m.

## S2 Cytoneme Live Imaging Methods

For live imaging, approximately  $4 \times 10^6$  cells were transfected with *pAc-GFP*, *pAc-disp-mCherry*, or *pAc-CD8-mCherry* as described in the manuscript. After ~48 hours, cells were washed twice with serum-free S2 media, resuspended in fresh S2 media supplemented with 10% FBS, and then plated into glass bottom dishes (MatTek, P35G-0.170-14-C). Cells were allowed to settle for 1.5 hours before imaging using Leica TCS SP8 resonance scanner mode. Entire z-stacks were taken at ~12 second intervals using the 100X objective. Images were processed as detailed in the manuscript before constructing the maximum intensity projection. Movies 1 and 2 were encoded to match timeframes between GFP co-expressed with CD8-mCherry or Disp-mCherry captures. Movie 3 was captured using a Leica SP8 with resonance scanner using the 100X objective. Z-stacks were taken every ~13 seconds and the movie was encoded at 2 frames per second of video. Growth and retraction rates were calculated by measuring distance traveled by a cytoneme divided by time taken to reach lag phase. Total duration included projection and full retraction including lag phases between growth and retraction events.

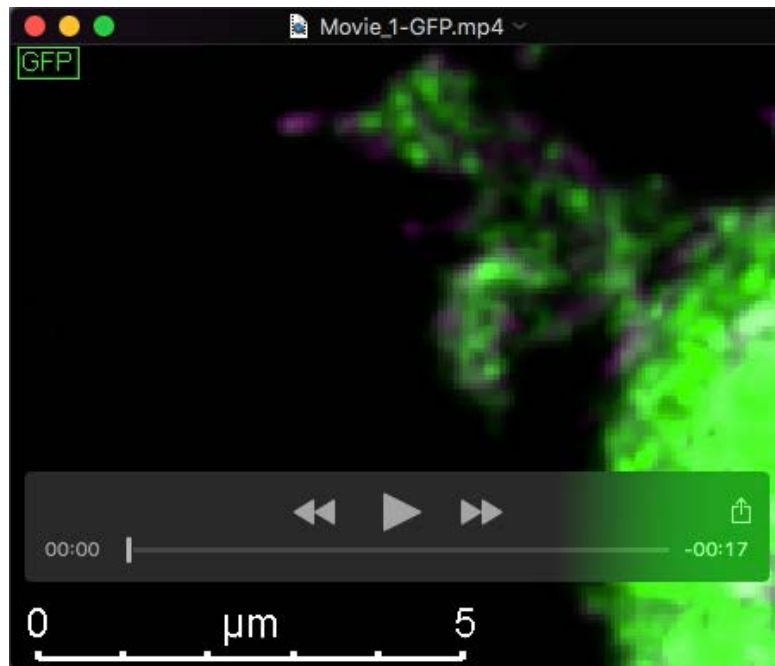

**Movie 1. Live imaging of cytonemes of a GFP and CD8-mCherry positive cell.** Images of the full axial plane of the cell were taken at 11.245 second intervals. The video was encoded with a 2.4 frame/second rate. GFP (green) and CD8-mCherry (magenta) are located within extensions which originate from regions of the cell not in contact with the slide.

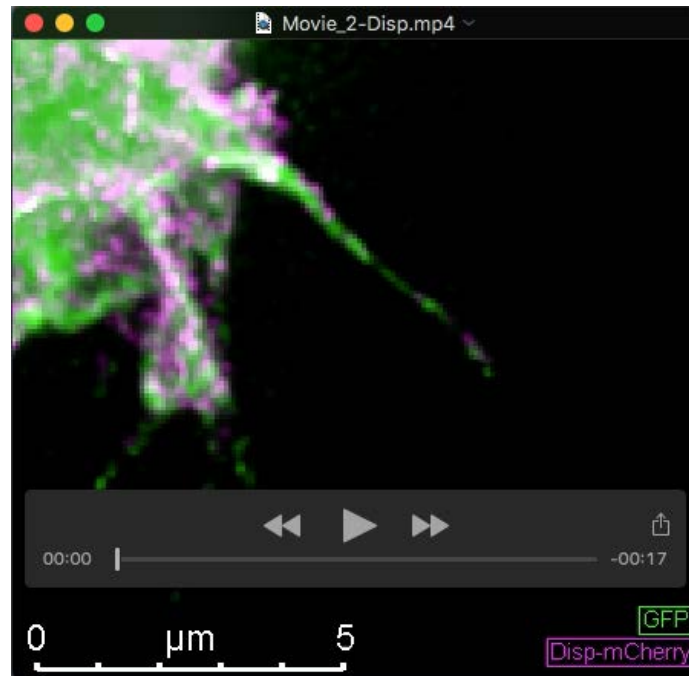

**Movie 2. Live imaging of cytonemes of a GFP and Disp-mCherry positive cell.** Images of the full axial plane of the cell were taken at 13.545 second intervals. The video was encoded with a 2 frame/second rate. In the time lapse, GFP (green) and Disp-mCherry (magenta) cytonemes exhibit slower retraction rates compared to control cells.

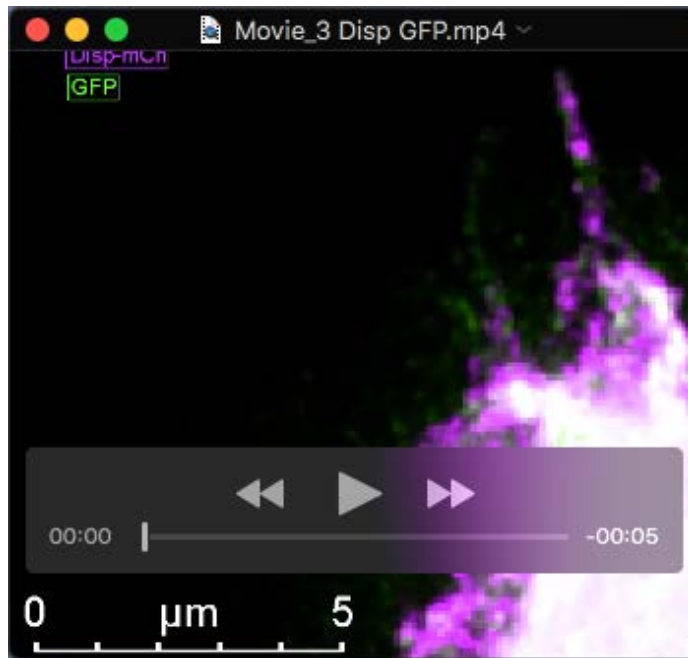

**Movie 3. Live imaging of Disp-mCherry puncta in cytonemes.** Images of the full axial plane of the cell were taken at 13 second intervals. The video was encoded with a 2 frame/second rate. Disp-mCherry (magenta) puncta travel along cytonemes. Cytoplasmic GFP is green.
